# Supplementary material for: Microglial Stimulation of Glioblastoma Invasion Involves Epidermal Growth Factor Receptor (EGFR) and Colony Stimulating Factor 1 Receptor (CSF-1R) Signaling
Source: Springer Nature journal article supplement (doi:10.2119/molmed.2011.00217), 2012-01-27
Supplement: 10020_2012_1803519_MOESM1_ESM.pdf [file 10020_2012_1803519_MOESM1_ESM.pdf]

Supplemental Data

**Microglial Stimulation of Glioblastoma Invasion Involves Epidermal Growth Factor Receptor (EGFR) and Colony Stimulating Factor 1 Receptor (CSF-1R) Signaling**

Salvatore J Coniglio,<sup>1</sup> Eliseo Eugenin,<sup>2</sup> Kostantin Dobrenis,<sup>3</sup> E Richard Stanley,<sup>4</sup> Brian L West,<sup>5</sup> Marc H Symons,<sup>6</sup> and Jeffrey E Segall<sup>1,7</sup>

Online address: <http://www.molmed.org>

The Feinstein Institute for Medical Research 

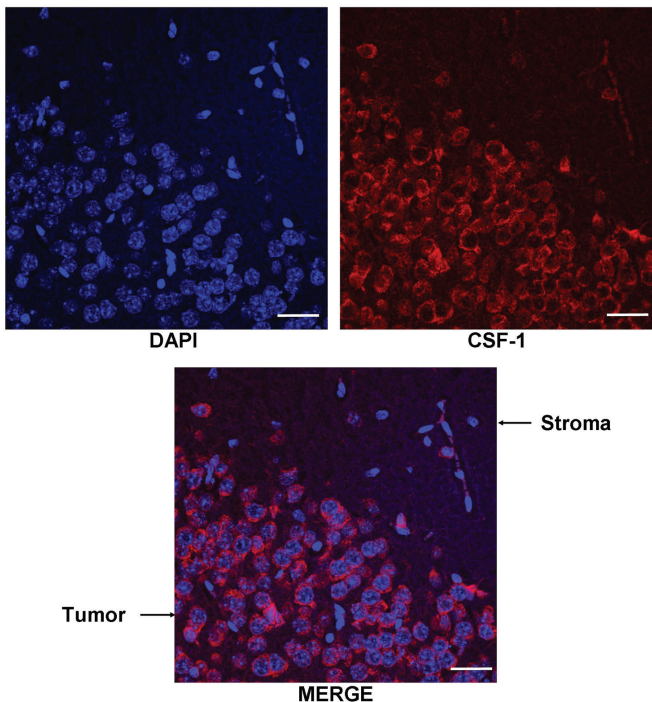

**Figure S1.** Formalin:fixed paraffin:embedded samples of mouse brains containing GL261 tumors (14 d after injection) were deparaffinized using xylene and ethanol. Samples were rinsed in PBS and incubated overnight with fluorophore:conjugated probes designed to hybridize to mouse CSF:1 mRNA (Stellaris Corp., Novato, CA). The slides were then washed and stained with DAPI for 10 min and visualized using confocal fluorescent microscopy at 63X magnification. The results shown are representative of three experiments. Scale bar = 10  $\mu$ M.

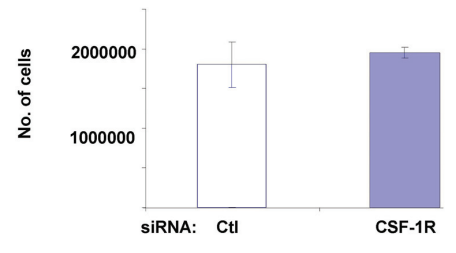

**Figure S2.** Microglia were counted five days after transfection with either control or CSF:1R siRNA as described in methods.
